# Supplementary material for: A MOF-derived CuO/TiO2 photocatalyst for methanol production from CO2 reduction in an AI-assisted continuous flow reactor
Source: Royal Society of Chemistry journal article supplement (doi:10.1039/d4cc05008h), 2024-01-01
Supplement: d4cc05008h3.pdf [file d4cc05008h3.pdf]

## Supporting information

### **MOF-Derived CuO/TiO<sub>2</sub> Photocatalyst for Methanol Production from CO<sub>2</sub> Reduction in an AI-Assisted Continuous Flow Reactor**

Bhavya Jaksani<sup>ab</sup>, Ruchi Chauhan<sup>bc</sup>, Switi Dattatraya Kshirsagar<sup>a</sup>, Abhilash Rana<sup>bc</sup>, Ujjwal Pal<sup>\*ab</sup> and Ajay K. Singh<sup>\*bc</sup>

a. Department of Energy & Environmental Engineering, CSIR-Indian Institute of Chemical Technology, Tarnaka, Hyderabad, Telangana-500007, India, E-mail: upal03@gmail.com.

b. Academy of Scientific & Innovative Research (AcSIR), Ghaziabad, Uttar Pradesh-201002, India.

c. Department of Organic Synthesis and Process Chemistry, CSIR-Indian Institute of Chemical Technology, Hyderabad 500007, India, E-mail: ajaysingh015@iict.res.in; ajaysingh015@gmail.com.

## Contents

### 1. Experimental section

#### 1.1 Materials

#### 1.2 Synthesis of CuMOF (CuBTC)

#### 1.3 Synthesis of MCT-100 (MOF derived CuO/TiO<sub>2</sub>)

#### 1.4 Synthesis of TiO<sub>2</sub>

#### 1.5 Characterization

#### 1.6 Photo-electrochemical studies

#### 1.7 Photocatalytic methanol production through batch mode

#### 1.8 Photocatalytic methanol production through Flow mode with Auto-optimization.

#### 1.9 Experimental design via Bayesian optimization (BO) for the photo flow methanol production.

**Figure S1.** XRD pattern of CuBTC

**Figure S2.** (a) Survey spectra of TiO<sub>2</sub> and MCT-100. XPS spectrum of (b) O1s (c) Ti 2p in TiO<sub>2</sub> and MCT-100. (d) XPS spectrum Cu 2p in MCT-100

**Figure S3.** EPR spectrum of TiO<sub>2</sub> and MCT-100

**Figure S4.** Recyclability test of the MCT-100 photocatalyst for methanol production

**Figure S5.** Tauc plots of (a) TiO<sub>2</sub> (b) MOF-CuO and (c) MCT-100

**Figure S6.** (a) Linear sweep voltammetry curves, and (b) transient photocurrent of TiO<sub>2</sub> and MCT-100

**Figure S7.** (a) TEM images MCT-100 (b) HRTEM images of MCT-100 (c) illustrates the lattice fringes of CuO and TiO<sub>2</sub>. Elemental mapping (d) Cu (e) Ti and (f) O

**Figure S8.** BET isotherms of (a) TiO<sub>2</sub> and (b) MCT-100

**Figure S9.** EDX pattern of MCT-100 showing copper is 1.3 at%

**Figure S10.** XRD pattern of MCT-100 before and after photocatalytic reaction in continuous flow

**Figure S11.** FTIR spectrum of MCT-100 before and after photocatalytic reaction in continuous flow

**Figure S12.** GC-MS chromatogram of reaction mixture showing m/z at 31.20 confirming the formation of methanol

**Table S1.** ICP-MS data of the photocatalysts

**Table S2.** Photocatalytic reduction of CO<sub>2</sub> into methanol using different photocatalysts

**Figure S13.** Manual designed photo-flow cartridge.

**Figure S14.** White LED light with PFA tubular cartridge filled with catalyst.

**Figure S15.** 3D graph of the relation between voltage (V), current (Amp) and blue light intensity(W).

**Figure S16.** Actual Picture of working syringe pump and Mass flow controller

**Figure S17.** Actual photograph of 3D printer as auto-fraction collector.

**Figure S18.** Algorithm flow chart of user-planning mode with two variables in the auto-optimization.

**Table S3.** Photo-flow auto-optimization reaction parameters boundary of methanol production

**Table S4.** Auto-optimization table of photo-flow methanol production.

**Table S5.** Calculation of rate of production of methanol

**Figure S19.** AI based system to auto-optimize and navigate this complexity and identify the optimal conditions for the photo activated methanol production.

**Figure S20.** 2D graph between no of experiments performed versus yield obtained through AI based auto-optimization for the production of methanol.

**Table S6:** Comparison table for photocatalytic methanol production.

## Experimental section

### 1.1 Materials

Copper nitrate trihydrate (Sigma Aldrich,  $\text{Cu}(\text{NO}_3)_2 \cdot 3\text{H}_2\text{O}$ ), trimesic acid (Sigma Aldrich,  $\text{H}_3\text{BTC}$ ), N, N dimethyl formamide (Sigma Aldrich, DMF), ethanol (Sigma Aldrich,  $\text{C}_2\text{H}_6\text{O}$ ), titanium isopropoxide (Avra,  $(\text{Ti}\{\text{OCH}(\text{CH}_3)_2\}_4)$ , D.I  $\text{H}_2\text{O}$ . PFA (id = 4 mm) tubing, T-junction, high-purity PFA tubing was purchased from Upchurch IDEX HEALTH & SCIENCE. The photo-batch reactor bought from Lelesil Mumbai India was slightly modified for the continuous flow reaction. White LFD light reactor was bought from the Smartchemsynth Machine Pvt. Ltd, Hyderabad.

### 1.2 Synthesis of CuMOF (CuBTC)

CuMOF is synthesized according to previously reported literature with slight modifications.<sup>1</sup> In a typical procedure, add 1.039 grams of copper nitrate ( $\text{Cu}(\text{NO}_3)_2 \cdot 3\text{H}_2\text{O}$ ) in 7.5 mL of deionized water. Stir the mixture vigorously at room temperature for 30 minutes until  $\text{Cu}(\text{NO}_3)_2 \cdot 3\text{H}_2\text{O}$  is completely dissolved. Next, in another round bottomed flask, take 7.5 mL of each of DMF,  $\text{C}_2\text{H}_6\text{O}$ , and 0.903 grams of  $\text{H}_3\text{BTC}$  and stir for 30 minutes until they are fully dissolved. Then combine both the solutions and stirring is continued. Later, transfer the mixed solution to a 100 mL Teflon-lined stainless-steel autoclave and hydrothermally treated at 120 °C for 12h. Afterward, the autoclave was allowed to cool down to room temperature, and a blue coloured precipitate was formed by centrifugation. The resultant precipitate washed with DMF followed by methanol for three times, then dried at 80 °C to obtain a Cu-MOF nanocomposite sample.

### 1.3 Synthesis of MCT-100 (MOF derived $\text{CuO}/\text{TiO}_2$ )

The final photocatalyst (MCT-100) is prepared by taking 20 mL of 4:1 ethanol/water mixture in to a round bottomed flask and 100 mg of Cu-BTC, sonication is done for 30 minutes to fully disperse the particles. Then add dropwise 2.5 mL of titanium isopropoxide ( $\text{Ti}\{\text{OCH}(\text{CH}_3)_2\}_4$ ) with continuous stirring and maintain stirring for 12h in an inert atmosphere. The precipitate is obtained by centrifugation, wash it with ethanol for three times followed by water, dried it in oven for whole night. The obtained precipitate is calcined at 450 °C for five hours in  $\text{N}_2$  atmosphere at ramping rate of 5°C/min. The same procedure is

done with the different amounts of CuBTC (10 mg, 50 mg and 200 mg) by taking the constant amount of titanium isopropoxide to obtain MCT-10, MCT-50, and MCT-200 respectively.<sup>2</sup>

#### **1.4 Synthesis of TiO<sub>2</sub>**

The TiO<sub>2</sub> is prepared by taking 20 mL of 4:1 ethanol/water mixture in to a round bottomed flask. Then dropwise add the 2.5 mL of titanium isopropoxide (Ti{OCH(CH<sub>3</sub>)<sub>2</sub>}<sub>4</sub>) with continuous stirring for 12h in an inert atmosphere. The precipitate is obtained by centrifugation, wash it with ethanol for three times followed by water, dried it in oven for whole night. The obtained precipitate is calcined at 450 °C for five hours in N<sub>2</sub> atmosphere at ramping rate of 5°C/min

#### **1.5 Characterization**

The structural phase analysis of the as-synthesized photocatalysts was performed by using Powder X-ray diffraction patterns (XRD) on a Bruker AXS diffractometer (D8 advance) at a generator voltage of 40 kV and current of 30 mA using Cu-K $\alpha$ 1 irradiation ( $\lambda = 1.5406 \text{ \AA}$ ). The sample was scanned in the  $2\theta = 10\text{-}80^\circ$  range with a scan rate of 1 s/step. X-ray photoelectron spectroscopy (XPS) was performed via a Kratos (axis 165) analytical instrument with Mg K $\alpha$  irradiation. About 10<sup>-9</sup> Torr pressure was maintained in the spectrometer. The structural morphology of the photocatalysts was examined by using MIRA3 FEG-SEM (TESCAN) Scanning electron microscopy (SEM) at an accelerating voltage of 5 kV. Transmission electron microscopy (TEM) image of the representative photocatalysts was obtained by using a JEOL 2010EX TEM instrument equipped with the high-resolution style objective-lens pole piece at an acceleration voltage of 200 kV fitted with a CCD camera. N<sub>2</sub> adsorption-desorption isotherms of the photocatalysts were obtained on a Quanta chrome Nova 2200e gas adsorption analyzer at 77 K. The optical properties were characterized by using UV-Vis diffuse reflectance spectroscopy (DRS) Perkin Elmer Lambda 750 instrument using BaSO<sub>4</sub> as a reference. The sample has been placed in the sample holder for the measurement and the light is allowed to pass through the sample which leads to the absorption of the light and the light transmitted by the sample has been recorded. The Photoluminescence (PL) spectra were recorded using a Fluorolog-3 spectrofluorometer (Spex model, JobinYvon) at their respective excitation ( $\lambda_{\text{ex}}$ ) wavelength. Fluorescence Lifetime decay measurements were carried out by using time-correlated singlephoton counting

(TCSPC) setup (Fluorolog-3 Triple Illuminator, IBH Horiba Jobin Yvon). Briefly, the samples were excited at 380 nm, and the emission was observed at 480 nm.

### **1.6 Photo-electrochemical studies:**

The entire photo-electrochemical test was carried out in the electrochemical workstation. 0.25 M aqueous solution of Na<sub>2</sub>SO<sub>4</sub> was used as an electrolyte for all experiments. Pt wire and calomel electrodes were used as counter and reference electrodes. The preparation of the working electrode is carried out using 20 μL of suspension (5 mg in 1mL ethanol) on ITO coated glass surface with a specific area of 2 cm<sup>2</sup>. The light source is considered as an Photoelectrochemical measurements at room temperature were recorded on the CH Instruments Inc., USA, CHI6005E, Electrochemical Workstation with Potentiostat using a three-electrode system with a standard three-electrode system with the photocatalyst-coated ITO as the working electrode, Pt wire as the counter electrode, SCE electrode as the reference electrode. The artificial solar simulator of AM 1G illuminator (100 mW cm<sup>-2</sup>) was used as the light source during the measurement. The electrochemical cell was a conventional 7 three-electrode cell with a 3 mm thick Pyrex glass.

### **1.7 Photocatalytic methanol production through batch mode**

The photocatalytic conversion of carbon dioxide to methanol is tested for all as synthesised catalysts. The photocatalytic reaction was carried out in 25 ml quartz reactor with reaction solution of 7 ml DMF + 1ml H<sub>2</sub>O with 50 mg of photocatalyst sealed with airtight rubber septum and degassed and purging with nitrogen for 15 min to remove dissolved gases and was purged with CO<sub>2</sub> for 30 min for saturating the solution with CO<sub>2</sub>. Then the reaction mixture was irradiated with carbon dioxide balloon for 4 hours using 420 W Xe lamp. The quantitative determination (conversion) of the reactions were analyzed by gas chromatography (GC) employing chromatograph (Perkin Elmer Clarus 590) equipped with flame ionization detector (FID). Columns (Stabilwax w/Integra-Guard column) were employed for the quantification of the products. flow rate: 0.5 mL min<sup>-1</sup>, injector temperature:250°C, FID detector temperature: 260°C) for determination of liquid products. A calibration curve of the CO<sub>2</sub> gas is set to in determining the linear response over the GC-FID system. Few neat reactions were carried out to establish that MeOH synthesis was caused by the photoreduction of CO<sub>2</sub>. Under similar experimental circumstances, a blank reaction was performed through the light irradiation without any suspension of the photocatalyst in the solution, and the other reaction doesn't include any light irradiation while the highest efficiency would be obtained on light irradiation,

with continuous carbondioxide flow. Here we have calculated the apparent quantum efficiency of CuO/TiO<sub>2</sub> towards the photocatalytic reduction of CO<sub>2</sub> towards methanol generation, at 420 ± 20 nm. The catalytic reaction mixture was irradiated under a 400 W LED lamp.

$$N_{\text{photon}} = \frac{P\lambda t}{hc}$$

Here, P = Power in terms of intensity of the light that is incident over the catalyst surface, (0.19 J s<sup>-1</sup> cm<sup>-2</sup>), specific surface area = 6 cm<sup>2</sup>, λ = wavelength (400 nm), t = time spent over the reaction for light irradiation (4 h), h = Planck's constant (6.626 x 10<sup>-34</sup> J s), whereas h = velocity of the light (3 x 10<sup>8</sup> m s<sup>-1</sup>).

$$\text{AQY} = \frac{6 \times \text{the no. of CH}_3\text{OH molecules produced}}{\text{the no. of incident photons (}N_{\text{photon}}\text{)}} \times 100$$

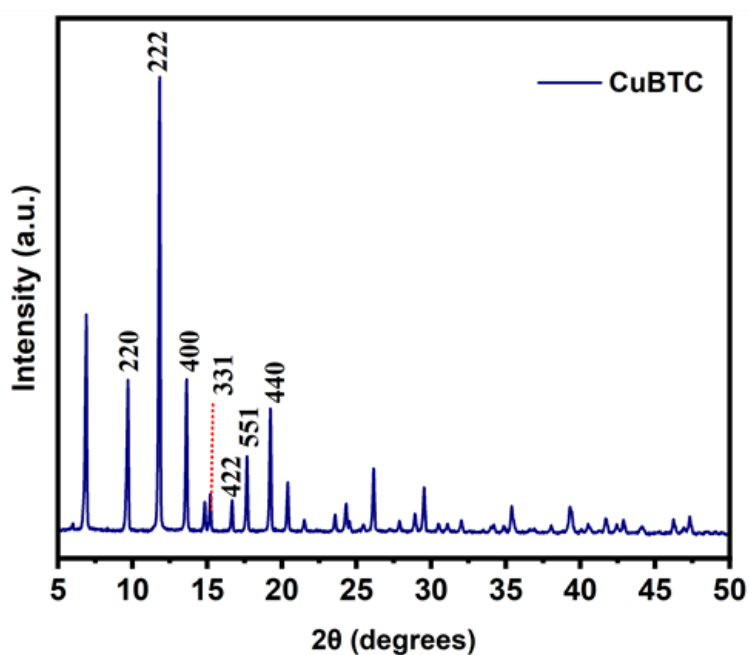

**Figure S1.** XRD pattern of CuBTC

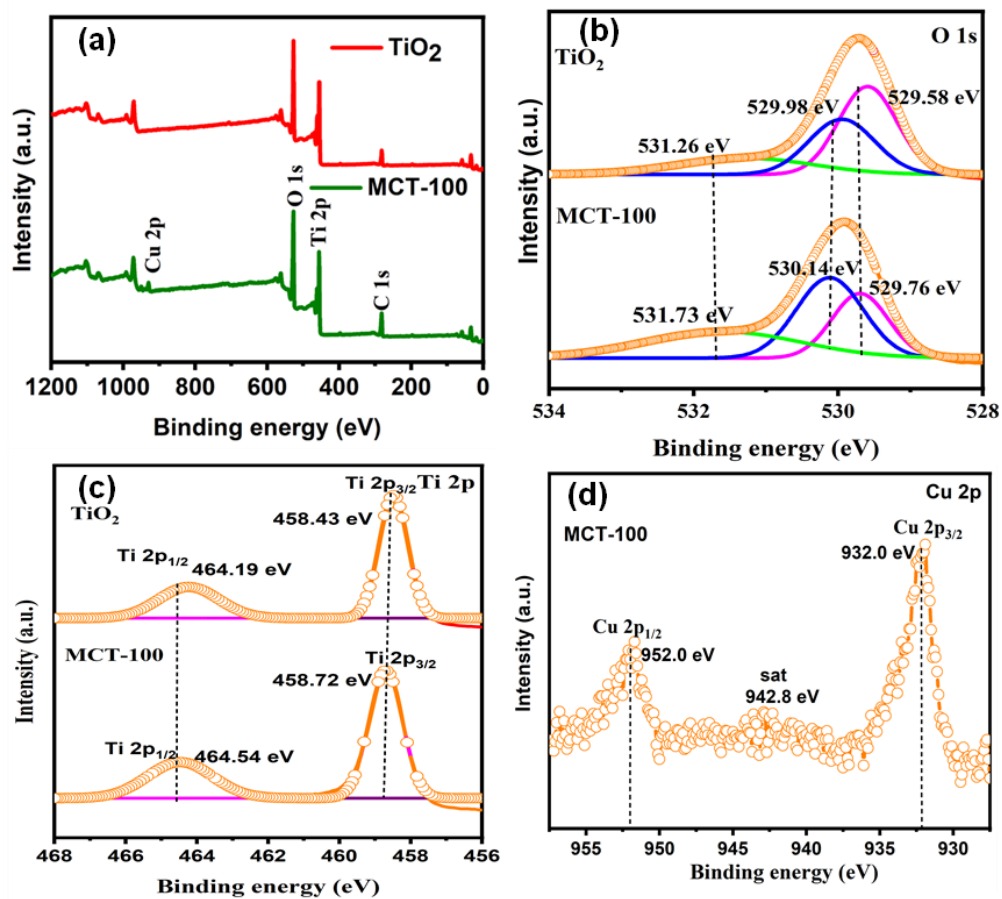

**Figure S2.** (a) Survey spectra of TiO<sub>2</sub> and MCT-100. XPS spectrum of (b) O 1s (c) Ti 2p in TiO<sub>2</sub> and MCT-100. (d) XPS spectrum Cu 2p in MCT-100



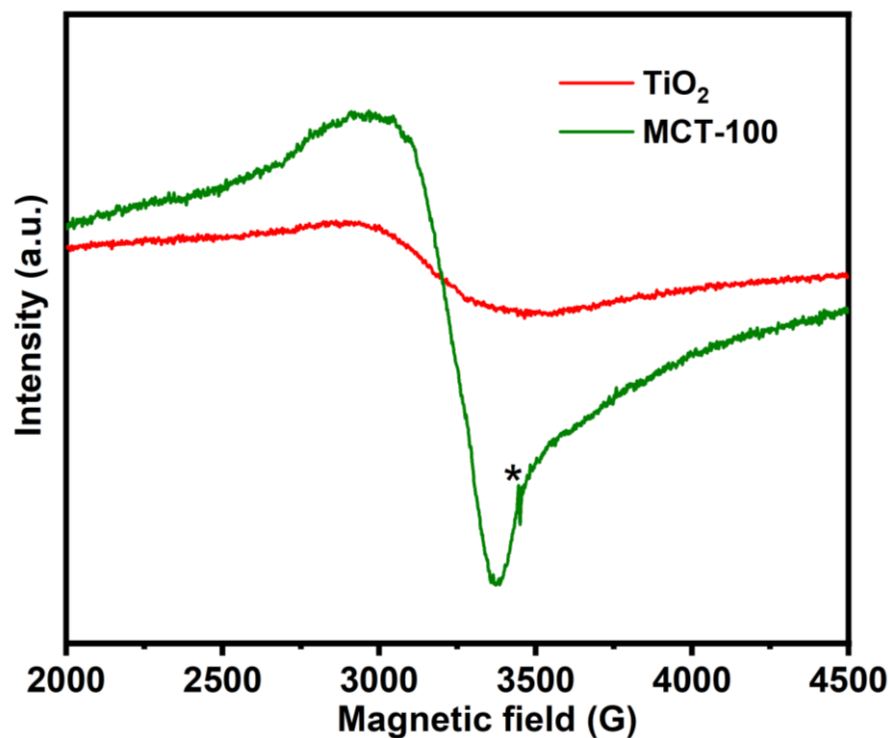

**Figure S3.** EPR spectrum of TiO<sub>2</sub> and MCT-100

The Electron paramagnetic Resonance (EPR) spectroscopy to identify paramagnetic species and to determine the oxidation states in TiO<sub>2</sub> and MCT-100. <sup>3</sup> The EPR spectrum of TiO<sub>2</sub> shows weak signals due to the paired electrons in Ti<sup>4+</sup>, while MCT-100 reveals a significant peak at  $g=2.06$ , confirming the presence of Cu<sup>2+</sup>.<sup>4</sup> A small but significant peak at  $g=1.99$  indicates the presence of Ti<sup>3+</sup> suggesting the formation of oxygen vacancies as shown in Fig.S3. These oxygen vacancies act as CO<sub>2</sub> adsorption sites and facilitate electron-hole separation, enhancing charge transfer, reducing recombination rates, and promoting the multi-electron reduction process necessary for converting CO<sub>2</sub> to methanol. <sup>5</sup>

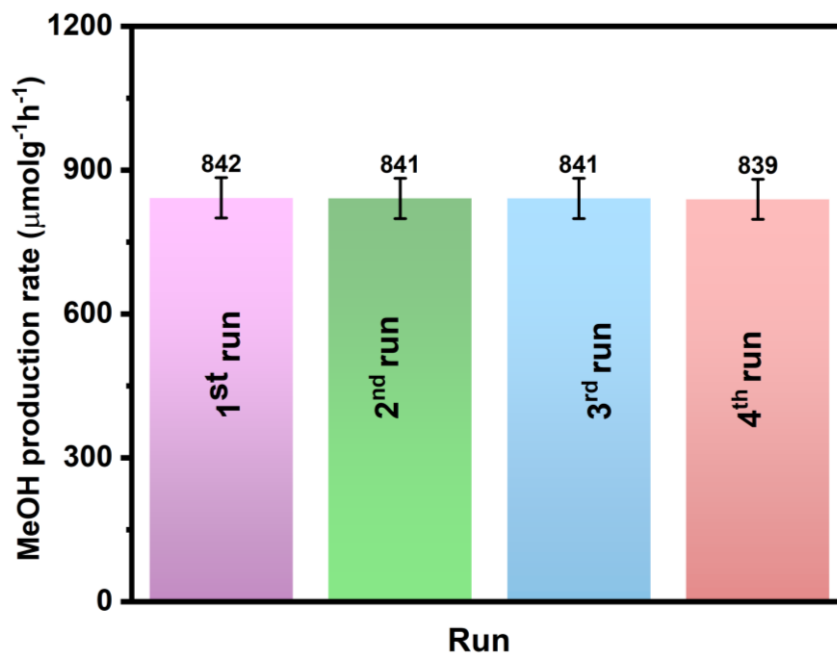

**Figure S4.** Recyclability test of the MCT-100 photocatalyst for methanol production

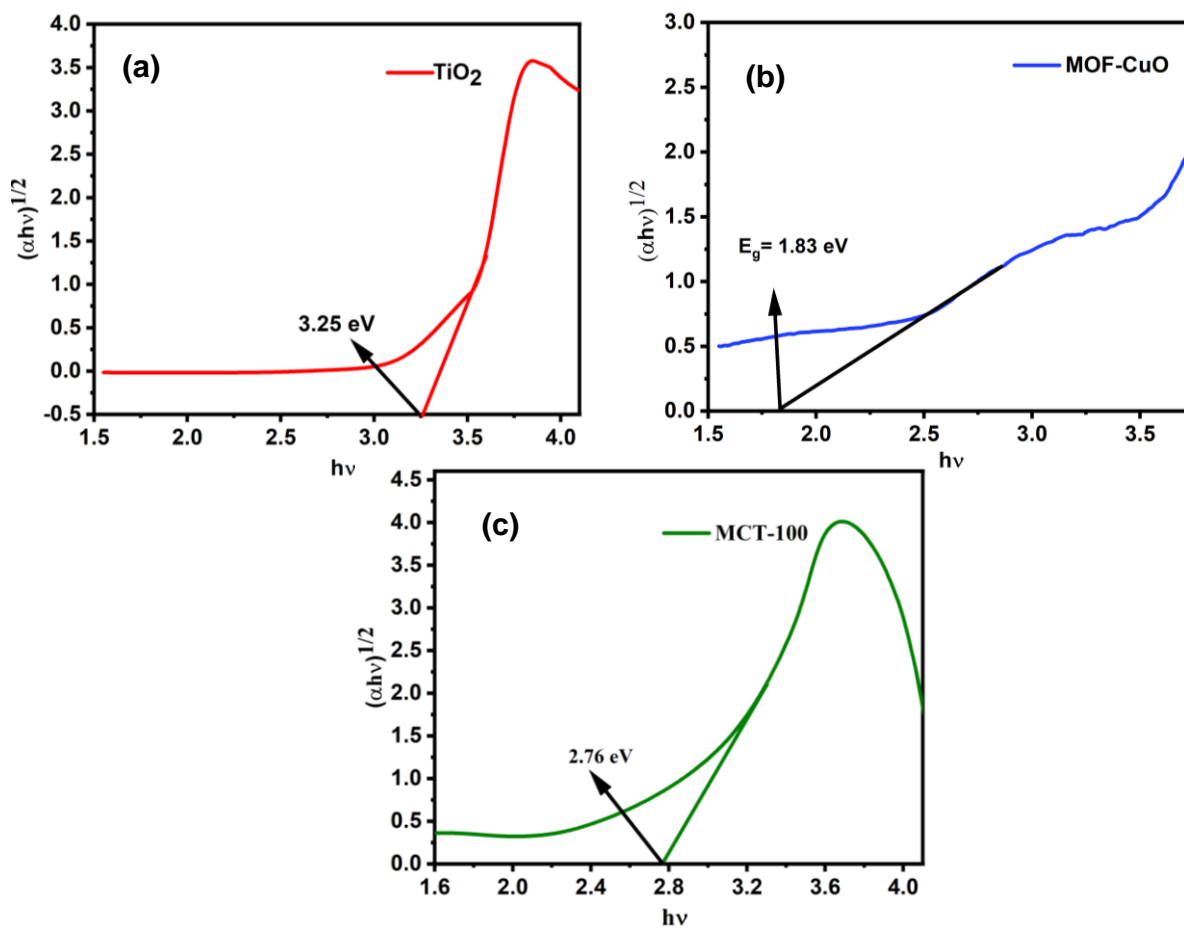

**Figure S5** Tauc plots of (a)  $\text{TiO}_2$  and (b)  $\text{MOF-CuO}$  (c)  $\text{MCT-100}$

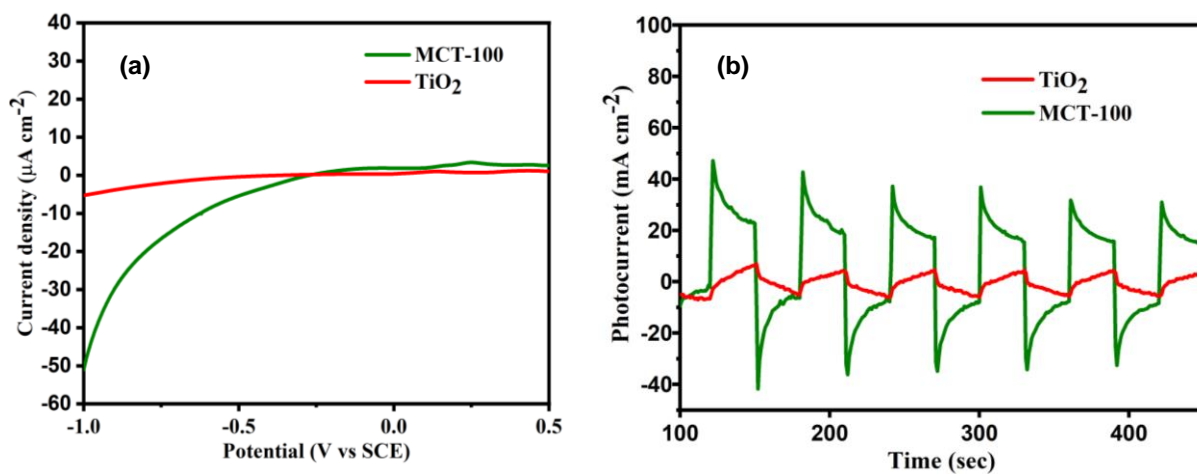

**Figure S6.** (a) Linear sweep voltammetry curves, and (b) transient photocurrent of  $\text{TiO}_2$  and MCT-

100

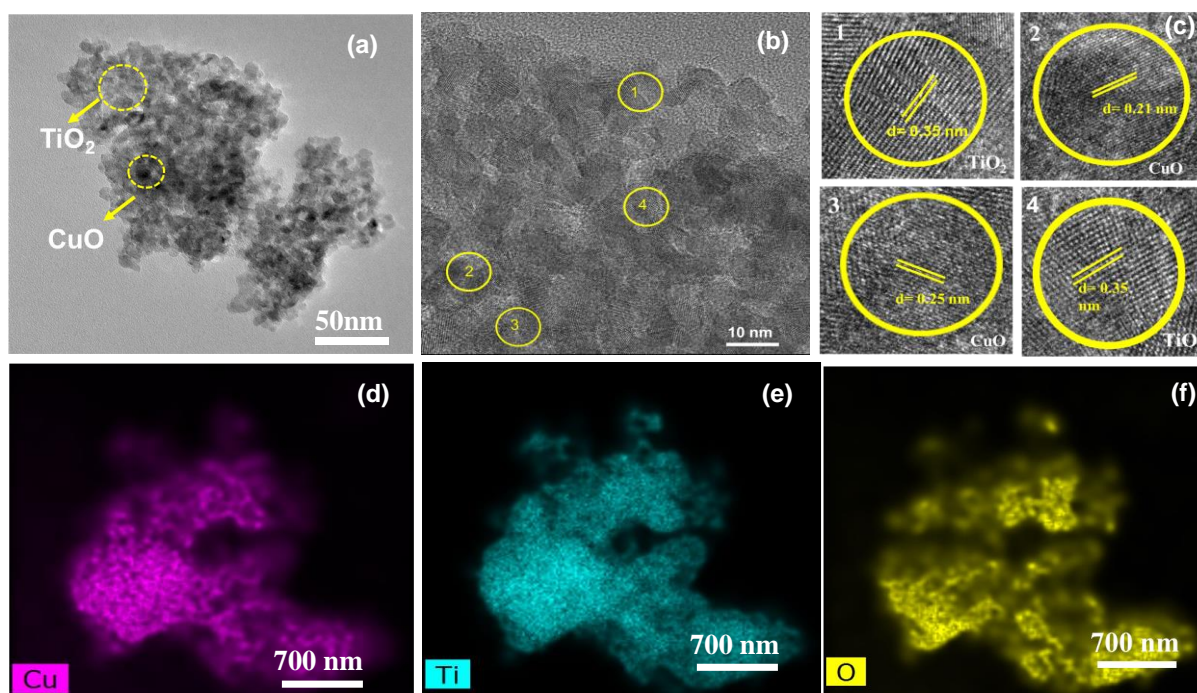

**Figure S7.** (a) TEM images MCT-100 (b)HRTEM images of MCT-100 (c) illustrates the lattice fringes of CuO and TiO<sub>2</sub>. Elemental mapping (d) Cu (e) Ti and (f) O

The transition electron microscopy (TEM) revealed the formation of heterostructures in MCT-100 between TiO<sub>2</sub> and MOF derived CuO as shown in Fig.S7 a, b The d-spacings of 0.35nm corresponding to the (101) interplanar distances of anatase TiO<sub>2</sub>,<sup>6, 7</sup> it could be observed clearly from the TEM images that Cu species enter into the lattice of TiO<sub>2</sub>. CuO with d-spacing of 0.25 nm<sup>8</sup> and 0.21 nm for the plane (1 1 0) and (1 1 1), respectively can also be found at the surface of TiO<sub>2</sub> as shown in Fig.S7c. The elemental analysis of the MOF derived CuO/TiO<sub>2</sub> nanocomposite binary system was investigated. The Figure (S7 d, e, f) confirms the presence of copper (Cu), titanium (Ti), and oxygen (O) elements. The mappings of each element, depicted in clearly indicate that these Cu, Ti, and O species are uniformly distributed across the entire selected area. This uniform distribution demonstrates the continuous presence of oxygen within the CuO particle and TiO<sub>2</sub>, extending through their interface. This portrayal effectively illustrates the establishment of a heterojunction between CuO and TiO<sub>2</sub>, facilitating the transfer of charges between the bands of the two semiconductors.

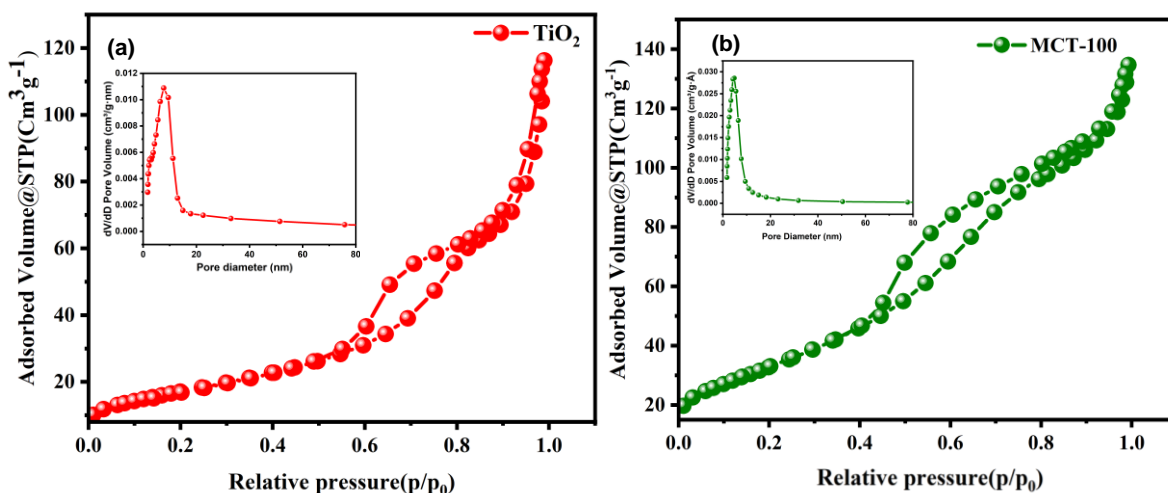

**Figure S8.** BET isotherms of (a)  $\text{TiO}_2$  and (b) MCT-100

The porosity characteristics of both  $\text{TiO}_2$  and MOF derived  $\text{CuO}$  (MCT-100) photocatalysts were assessed through nitrogen adsorption–desorption isotherms using BET and BJH techniques as shown in (Fig.S8 a, b). The calculated specific surface area (BET) values for  $\text{TiO}_2$  and MOF derived  $\text{CuO}/\text{TiO}_2$ (MCT-100) are  $62.12 \text{ m}^2 \text{ g}^{-1}$  and  $122.11 \text{ m}^2 \text{ g}^{-1}$ . The MOF derived  $\text{CuO}$  on to the  $\text{TiO}_2$  shows higher surface area. The specific surface area of a nanocomposite has a direct correlation with the surface-active sites, which have been found to be a controlling factor in photocatalytic activity. A hysteresis loop in the type-IV isotherm adsorption–desorption isotherm was observed at higher pressures, indicating the presence of mesopores.<sup>9</sup> Additionally, examination of the pore size distribution curve reveals that the average Barrett–Joyner–Halenda (BJH) pore diameters for  $\text{TiO}_2$  and MCT-100 are 5.7 nm and 10.8 nm, respectively, suggesting that the as-prepared nanocomposites possess a mesoporous structure.

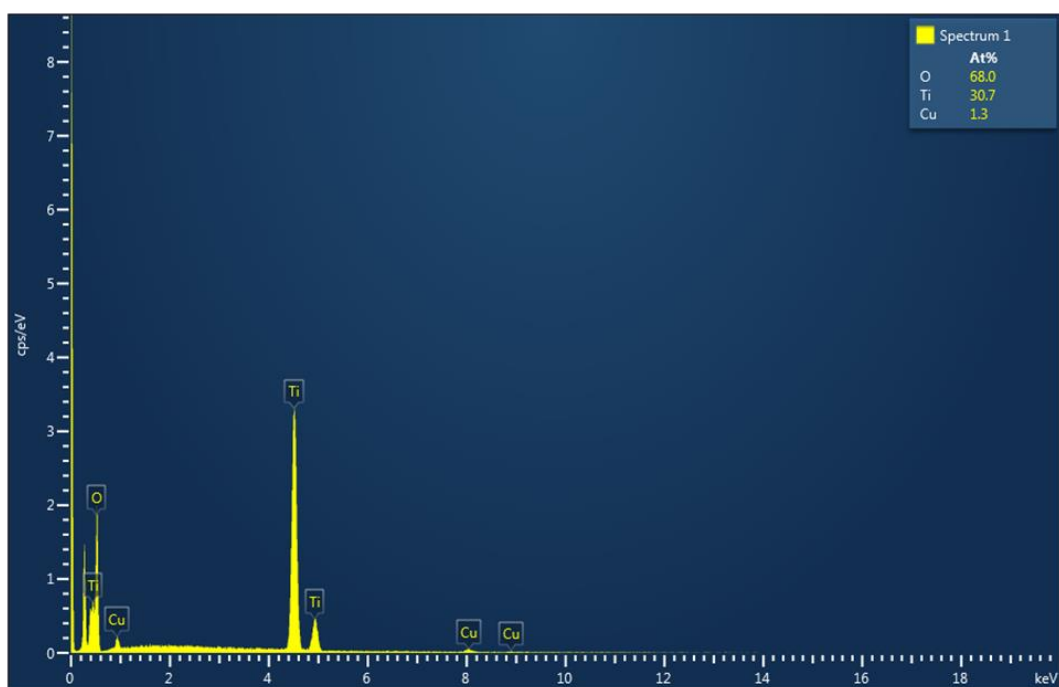

**Figure S9.** EDX pattern of MCT-100 showing copper is 1.3 at%

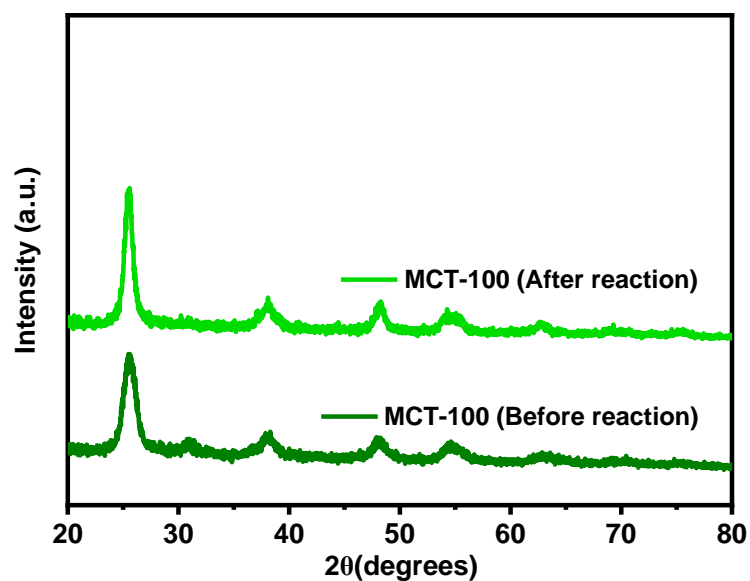

**Figure S10.** XRD pattern of MCT-100 before and after photocatalytic reaction in continuous flow

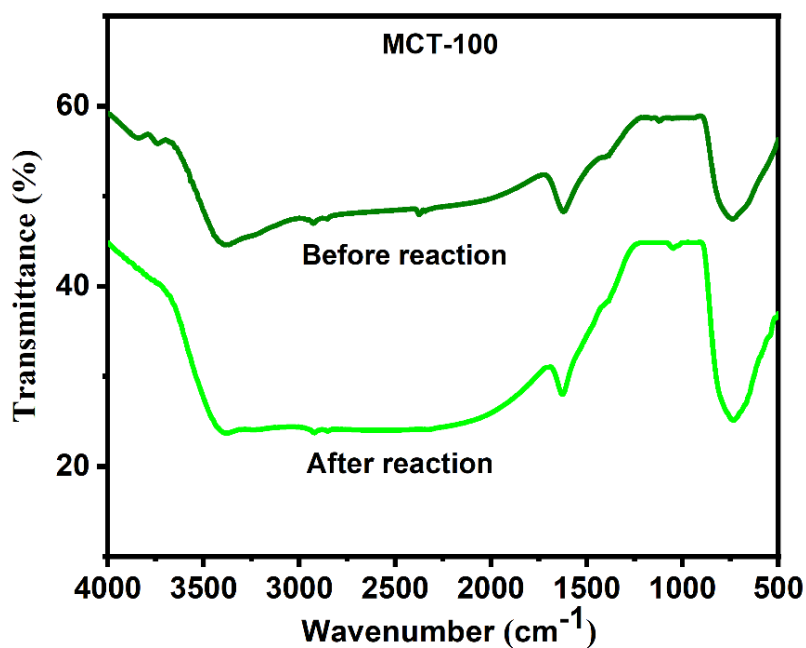

**Figure S11.** FTIR spectrum of MCT-100 before and after photocatalytic reaction in continuous flow.

To assess the catalyst's stability, XRD and FTIR studies were conducted on the catalyst samples before and after the photoreduction reaction. No changes in peak positions were observed in the XRD and FTIR patterns, (Fig S10, S11) indicating the catalyst remained stable throughout the reaction.

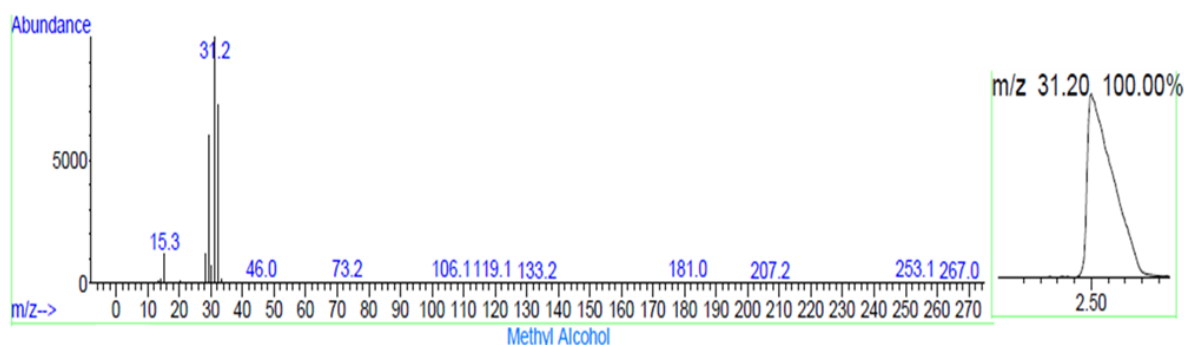

**Figure S12.** GC-MS chromatogram of reaction mixture showing m/z at 31.20 confirming the formation of methanol

**Table S1.** ICP-MS data of the photocatalysts

| S.NO | Photocatalyst | Conc. [ ppb] (Cu) |
|------|---------------|-------------------|
| 1    | MCT-10        | 1286.6            |
| 2    | MCT-50        | 7882.4            |
| 3    | MCT-100       | 11293.9           |
| 4    | MCT-200       | 25490.7           |

**Table S2.** Photocatalytic reduction of CO<sub>2</sub> into methanol using different photocatalysts

| S. No | Catalyst         | Reaction precursor | Cat (mg) | Visible-Light illumination | MeOH Rate ( $\mu\text{mol g}^{-1}\text{h}^{-1}$ ) |
|-------|------------------|--------------------|----------|----------------------------|---------------------------------------------------|
| 1     | None             | CO <sub>2</sub>    | NIL      | YES                        | NIL                                               |
| 2     | TiO <sub>2</sub> | CO <sub>2</sub>    | 50       | YES                        | 64                                                |
| 3     | MCT-10           | CO <sub>2</sub>    | 50       | YES                        | 541                                               |
| 4     | MCT-50           | CO <sub>2</sub>    | 50       | YES                        | 702                                               |
| 5     | MCT-100          | CO <sub>2</sub>    | 50       | YES                        | 842                                               |
| 6     | MCT-100          | N <sub>2</sub>     | 50       | YES                        | NIL                                               |
| 7     | MCT-100          | CO <sub>2</sub>    | 50       | NO                         | NIL                                               |
| 8     | MCT-200          | CO <sub>2</sub>    | 50       | YES                        | 567                                               |



## 1.8 Photocatalytic methanol production through Flow mode with Auto-optimization.

Basic experimental setups for the photochemical auto-optimization platform.

**1.8.1 Micro reactor system:** A homemade PFA tubing (volume 1 mL; od 1.58 mm, id 1 mm, l = 1.3 meter) was fabricated as cartridge filled with 0.5 g of catalyst with molecular sieves shown in figure xx for the photochemically methanol production. The cylindrical reactor was placed for irradiation by a white light LED. The top of photochemical reactor was covered with aluminum foil to enhance light absorption.

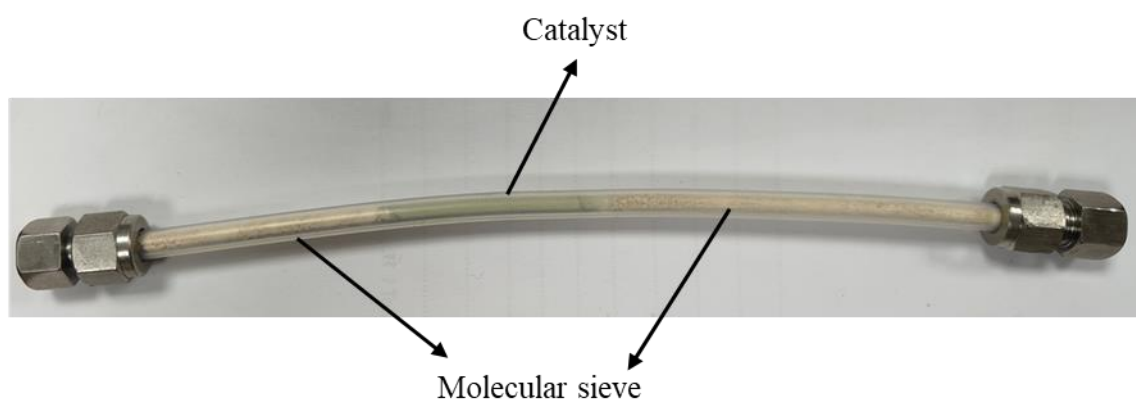

**Figure S13.** Manual designed photo-flow cartridge.

**1.8.2 White LED reactor:** We obtained a commercially available cylindrical-shaped 60W White LED (Figure S14a) for the photochemical reaction. We utilized a programmable power supply to control the lamp's power (in watts) by controlling the current and voltage (Figure. S14b). The power supply was connected to the central system through RS 232 to control the current and voltage.

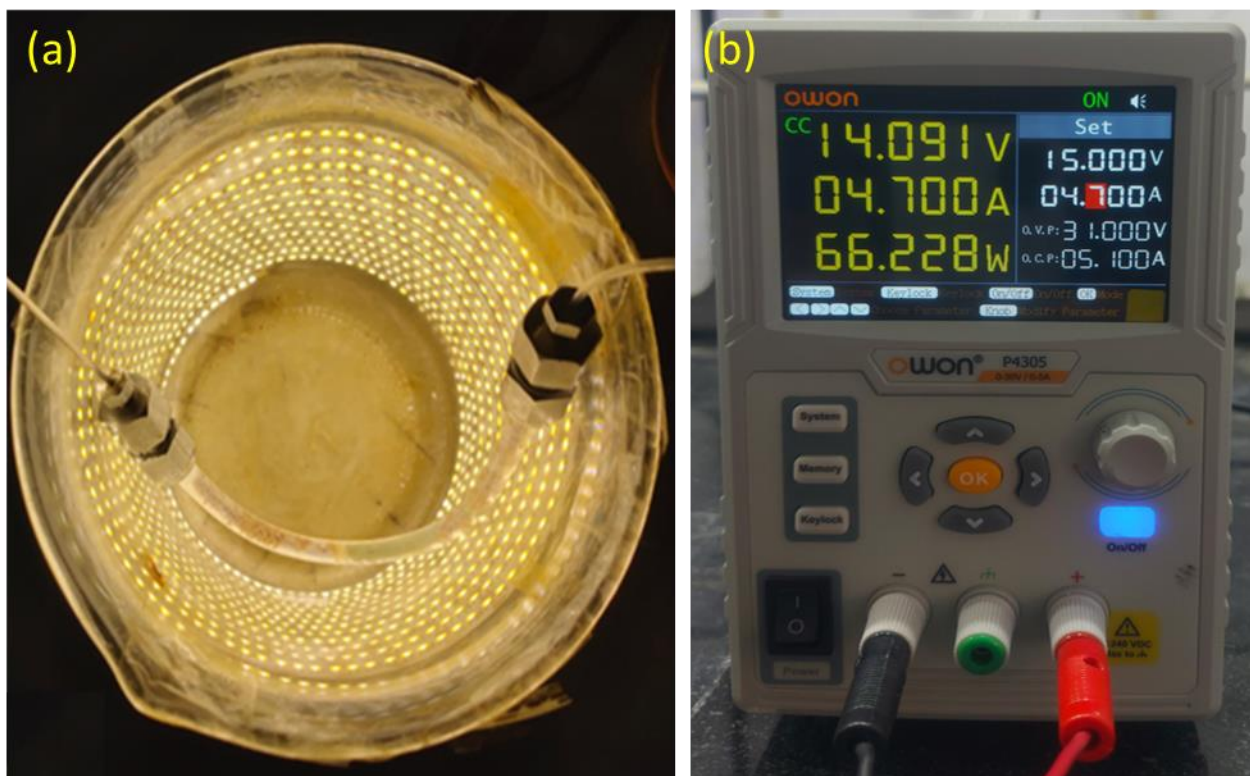

**Figure S14.** a) White LED light with PFA tubular cartridge filled with catalyst; (b) power supply.

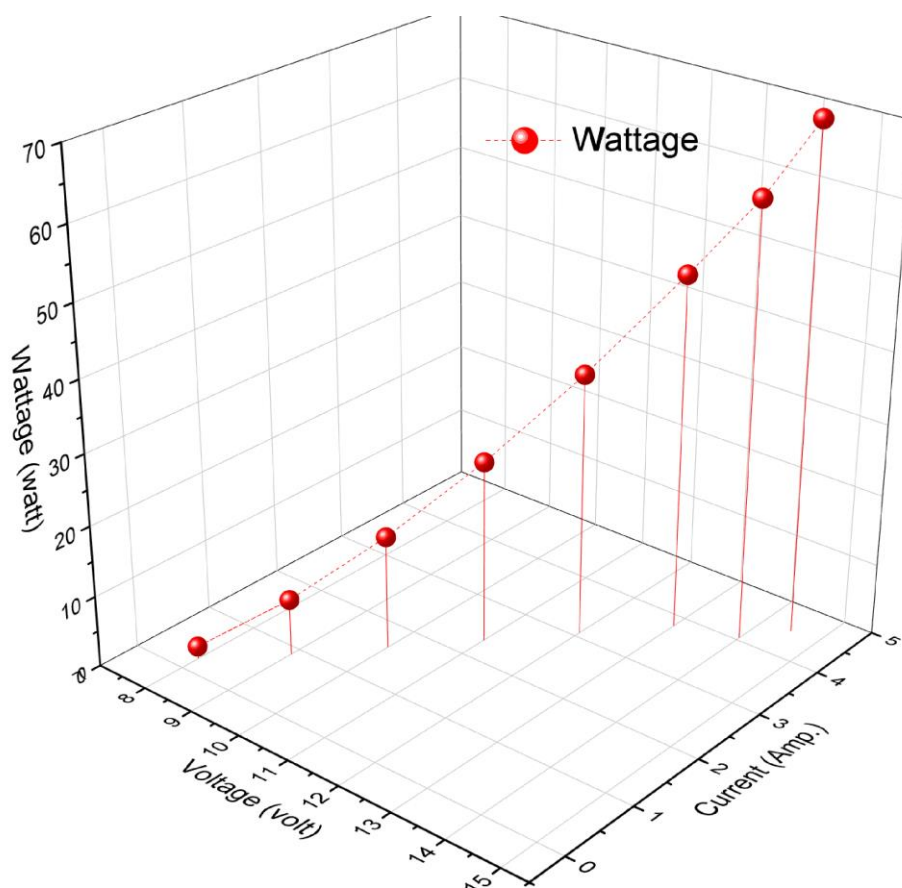

**Figure S15.** 3D graph of the relation between voltage (V), current (Amp) and white light intensity (W).

**1.8.3 Pumps:** The Syringe pump were directly connected to the main computer via an RS-232 interface. These S10 pumps introduced reactant solutions into the PFA cartridge at the central computer's prescribed flow rate (Figure S16), and the flow rate of CO<sub>2</sub> gas was controlled with micro flow controller (MFC) which is connected to main computer system via COM. To convey information regarding the flow rate, operational status, and duration, serial communication utilizing ASCII code was employed between the central computer and the syringe pump. This allowed the main computer to transmit the necessary details to the pumps, enabling them to initiate their operations accordingly.

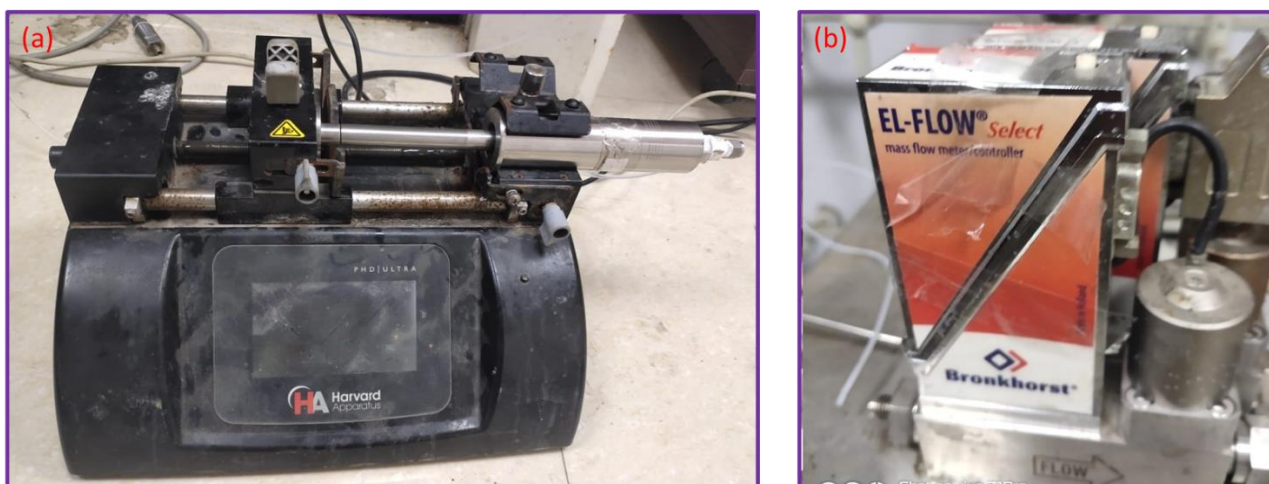

**Figure S16.** Actual Picture of working syringe pump and Mass flow controller

**1.8.4 Auto-collector:** We utilized a commercially available 3D printer for the auto-sampler as reported in one paper. The Python program on the central computer interfaced with the 3D printer. The Python program commanded the 3D printer to rotate, and this information was communicated to USB serial communication. This setup allowed us to control the 3D printer for tasks such as sample collection, reactor stabilization, and washing in various situations (Figure. S17).

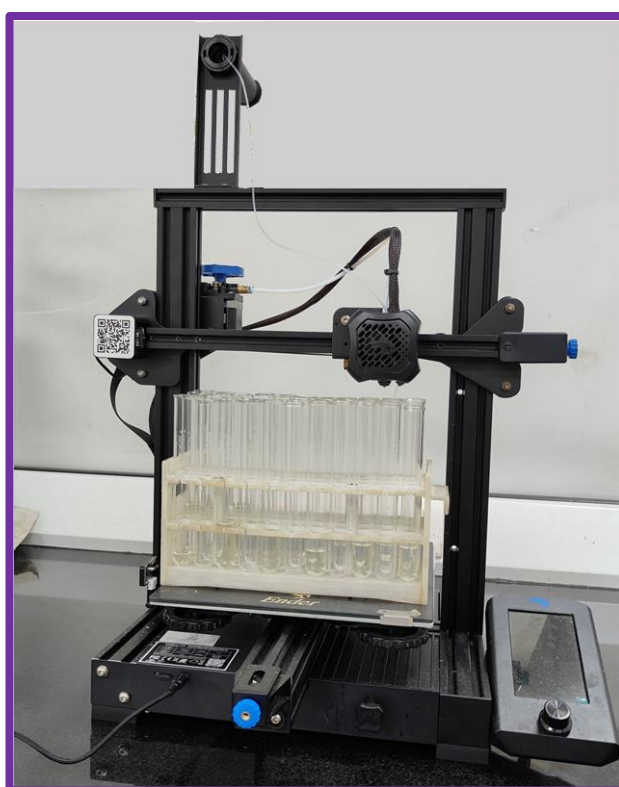

**Figure S17.** Actual photograph of 3D printer as auto-fraction collector.

**1.8.5 Auto-optimized reactor system:** We have all accessories like pumps, LED light reactor, Owon power supply, and 3D printer connected to the central computer system with RS 232 and USB cable. We have made a combined program including Bayesian optimization for automatically changing the parameters such as flow rate and power of irradiation of white light to maximize yield.

**1.8.6 Bayesian optimization algorithm.**

The Bayesian optimization algorithm used in this platform was a modified version of a meta-optimizer (MO) algorithm consisting of multiple surrogate models and a single acquisition function. The surrogate models used in this algorithm were similar to the original reported one, and the surrogate model was selected as an expected improvement. To proceed with the optimization process, the Sobol algorithm was chosen to generate the initial point before the commencement of the main Bayesian optimization loop for 3 consecutive rounds. Then, the meta-optimizer loop was started to maximize the reaction build (Figure. S18).

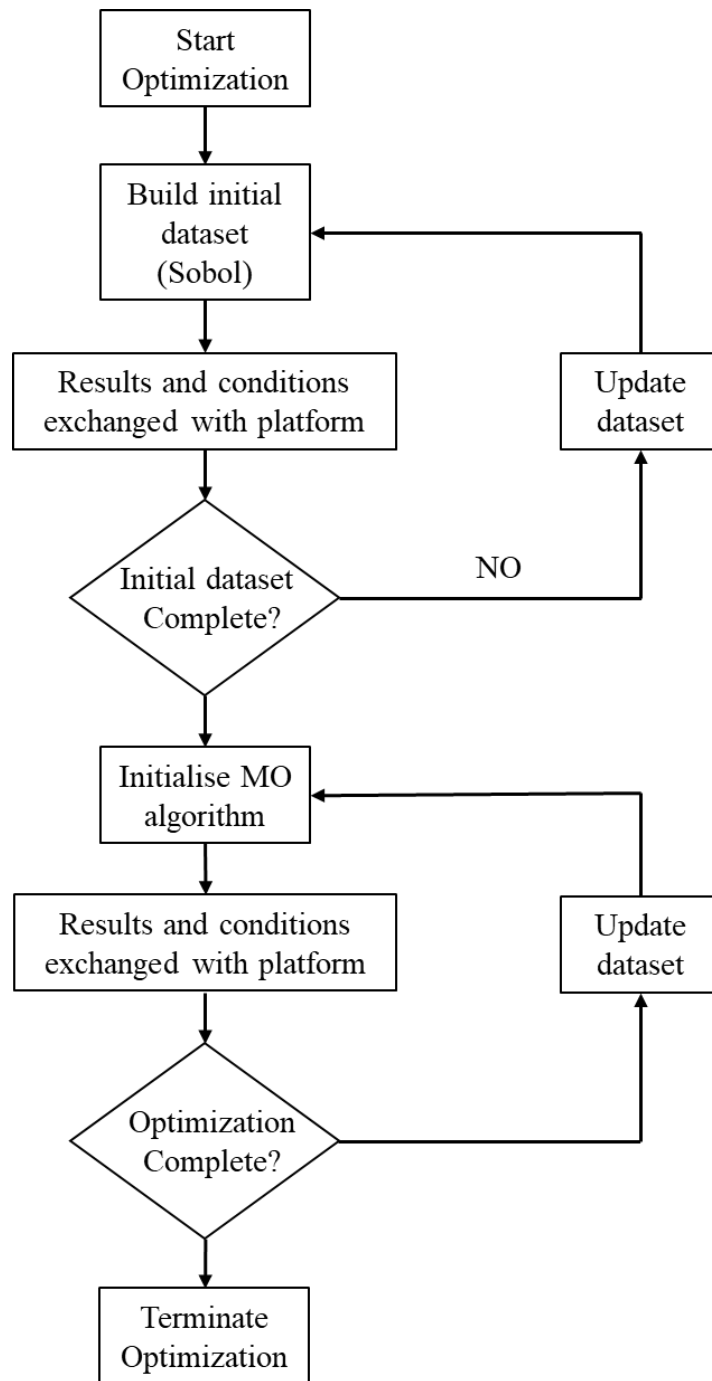

**Figure S18.** Algorithm flow chart of user-planning mode with two variables in the auto-optimization.

## 1.9 Experimental design via Bayesian optimization (BO) for the photo flow methanol production.

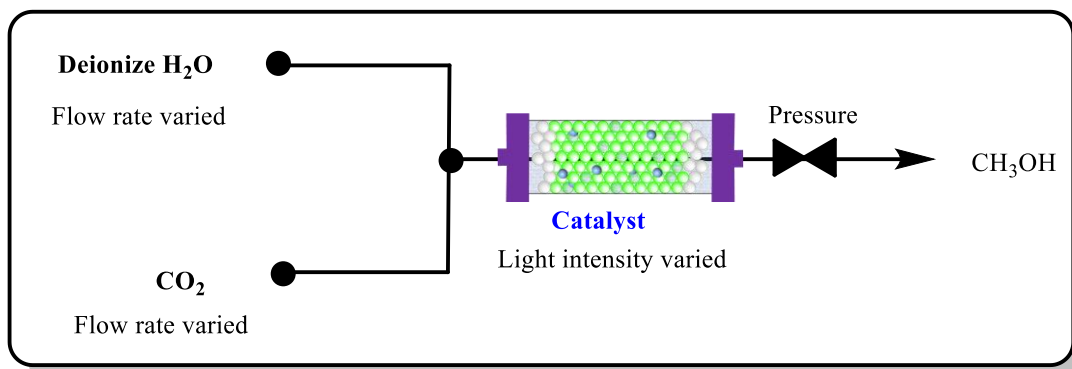

The syringe pumps and MFC were manipulated as programmed in the central computer to inject and control the flow rates of the two respective solutions comprising deionize water and CO<sub>2</sub> gas. Both solutions were introduced through a T-mixer at varied flow rate ( $Q$ ) and then passed through a PFA cartridge (od = 1/4, id = 4 mm, l = 0.21 m, vol. = 1mL) filled with catalyst exposed to various white light intensity ( $W$ ) exposure. The top of photochemical reactor was covered with aluminium foil to enhance light absorption. The resulting solution after passing through PFA cartridge under pressure and collected in our previously reported auto-collector. Bayesian optimizer (BO) will present the following values for the variable flow rate and white light ( $W$ ). In this optimization, analysis is done out-station with GC-FID for methanol detection for every fraction which is collected. After running first condition given by BO we need to write the yield.

## Python Code

```
rc.py* X
1  from os import listdir
2  from os.path import isfile, join
3  import serial
4
5  import numpy as np
6  import pandas as pd
7  import time
8
9
10 import propar
11
12 #step1: be sure to the address of the files that the ftir data is exported is matching to line 11 (mypath)
13 #mypath = "abhlilash\\soft\\test mfc code\\Dummy Data"
14
15 mypath="C:\\Users\\Dr.AJAY K SINGH\\Desktop\\RUCHI\\23-04-2024"
16
17
18
19 onlyfiles = [f for f in listdir(mypath) if isfile(join(mypath, f))]
20
21
22 #step2: make sure that pump and the potentiostat is correctly addressed in the line 16 and 17
23 pump_1 = serial.Serial("COM13",9600) #HPLC Pump
24 port = serial.Serial("COM1",115200)
25 printer = serial.Serial("COM14", 115200, timeout=1)
26 MFC = propar.instrument("COM8")
27 port = serial.Serial("COM7",115200) #power_supply
28
29 def gas_flow(set_val):
30
31     MFC.writeParameter(206, set_val)
32
33
34 def valve_reset():
35     #run if valve is refusing to close, i.e. in forced full open mode
36
37     MFC.writeParameter(12, 0)
38
39     return "valve was reset"
40
41
42 def function(flowrate_1,flow_g,v,i,time_hold):
43
44     #set the pumps with the flowrate as the desired flowrate for the function
45
46
47     fr_1 = flowrate_1*1000 #ml/min
48     pump_1.write(('fLow: '+ str(fr_1) + '\r').encode())
49     time.sleep(0.1)
50
```

```
51 #pumps run
52 pump_1.write(b'on\r')
53 time.sleep(0.1)
54 gas_flow(flow_g)
55
56 vol = v
57 curr = i
58 port.write(('VOLT '+str(vol)+'\r\n').encode()) #to change the volatge we need to use "VOLT 1" command
59 port.write(('CURR '+str(curr)+'\r\n').encode()) #to change the current we need to use "CURR 1" command
60
61 time.sleep(0.1)
62
63 time.sleep(time_hold)
64
65 #step 4:grab the line 93 and f9
66 from skopt.optimizer import Optimizer
67
68
69 #step5:in line 96 we have to define the range that (flowrate,flow_gas) (from,to) and after (anytime) applying changes you need to grab the line 96 and f9
70 #flowrates are in ml/min
71 bounds = [(0.1,0.5),(10,30),(12.5,14.5),(4.9,5.0)]
72 #step 6: grab the line 100 and f9
73 opter =Optimizer(bounds,base_estimator='gp',n_initial_points=3,acq_func="EI",random_state=np.random.randint(3326))
74
75
76 #step7: to selecte number of the cycles that you have to do the experiment and then grab the line 104 to 121 and f9: the closed loop experimentation is initiated
77 number of cycles =22
78 results = []
79 flowrates_1 = []
80 flow_g = []
81 vs = []
82 currents = []
83
84
85 product_percentage=True #set to true if product wavelenghts being monitored
86
87 if product_percentage == True:
88     val=1
89 else:
90     val=-1
91
92
93 # Step 8: Test Tubes on Printer
94 USE_PRINTER = True
95 REST_HEIGHT = 200
96 X_HOME = -5
97 Y_HOME = 20
98 Z_HOME = 175
99 DEFAULT_PUMP_TIME="1"
100 # Distance between test tubes
101 X_SPACING=20
102 Y_SPACING=20
103 # Number of test tubes
```



```

104 X_ROWS = 11
105 Y_COLUMNS = 4
106
107 def send_cmd(cmd):
108     print(cmd)
109     printer.write(f"{cmd}\n".encode("ASCII"))
110
111 def move(x=None, y=None, z=None):
112     s = "G0"
113     if x is not None:
114         s += f"X{x}"
115     if y is not None:
116         s += f"Y{y}"
117     if z is not None:
118         s += f"Z{z}"
119
120     s+= "F5000"
121     send_cmd(s)
122
123 def printer_positions():
124     for j in range(Y_COLUMNS):
125         for i in range(X_ROWS):
126             if j%2==1:
127                 yield (X_HOME + (X_ROWS - 1 - i) * X_SPACING, Y_HOME + j * Y_SPACING, Z_HOME)
128             else:
129                 yield (X_HOME + i * X_SPACING, Y_HOME + j * Y_SPACING, Z_HOME)
130
131 # Run this.
132 tube_location = list(printer_positions())
133

```

```

134 try:
135     valve_reset()
136     for i in range(number_of_cycles):
137         move(*tube_location[2*i])
138         asked = opter.ask()
139         print(asked[0])
140         print(asked[1])
141         print(asked[2])
142         print(asked[3])
143
144         time_hold_reaction=800#time for each run
145
146         function(asked[0],asked[1],asked[2],asked[3],time_hold_reaction)
147         move(*tube_location[2*i+1])
148
149         #hplc input value
150
151         time.sleep(1300) #for collection in 2nd test tubeA
152         function(0,0,0.01,0.001,0) #turns off pump and power supply
153
154         offline_told = float(input("give the results from offline analysis\n"))
155         opter.tell(asked,offline_told*(-val))
156
157         results.append(offline_told)
158         flowrates_1.append(asked[0])
159         flow_g.append(asked[1])
160
161         dict1 = {"flowrate_1":flowrates_1,"flow_g":flow_g,"area-results":results}
162         df2 = pd.DataFrame(dict1)
163         df2.to_csv("output round "+str(i)+".csv")
164 finally:
165     pump_1.write(b'off\r')
166     gas_flow(0)
167

```

**Table S3.** Photo-flow auto-optimization reaction parameters boundary of methanol production

| Parameters | Flow rates of<br>water<br>(mL/min.) | Flow rates of<br>gas<br>(mL/min.) | Volage<br>(volt) | Current<br>(amp) | Light Power<br>(watt) |
|------------|-------------------------------------|-----------------------------------|------------------|------------------|-----------------------|
| Boundary   | 0.1-0.5                             | 10-50                             | 12.5-14.5        | 4.9-5            | 43-68                 |

### **General procedure for the auto-optimized production of methanol.**

In our approach we are employing a python-coded based Bayesian optimization strategy for further refinement. Initial steps involved to check all the pumps, white LED and 3D printer connected to computer system and then filled the deionize water in one syringe and connected to a syringe pump on other hand MFC was connected to CO<sub>2</sub> gas cylinder. Both gas and deionize water mixing at T-mixer and resulting solutions were then directed through a PFA tubular cartridge (inner diameter = 4 mm, length = 0.21 m, volume = 2.6 mL, filled with 0.5 g of catalyst, free volume 1 mL) surrounded by a cylindrical-shaped white LED light source under 10 bar pressure. Once the solution setup was complete, input ranges for variable flow rates, voltages, and current were specified in the Python code designed for the reaction. The Bayesian optimizer systematically explored these varying reaction conditions, aiming to achieve maximum yield. The optimization process involved running 22 experiments, analysis is done outstation utilizing GC-FID and the results were tabulated in the optimization table (Table.S4).

**Table S4.** Auto-optimization table of photo-flow methanol production.

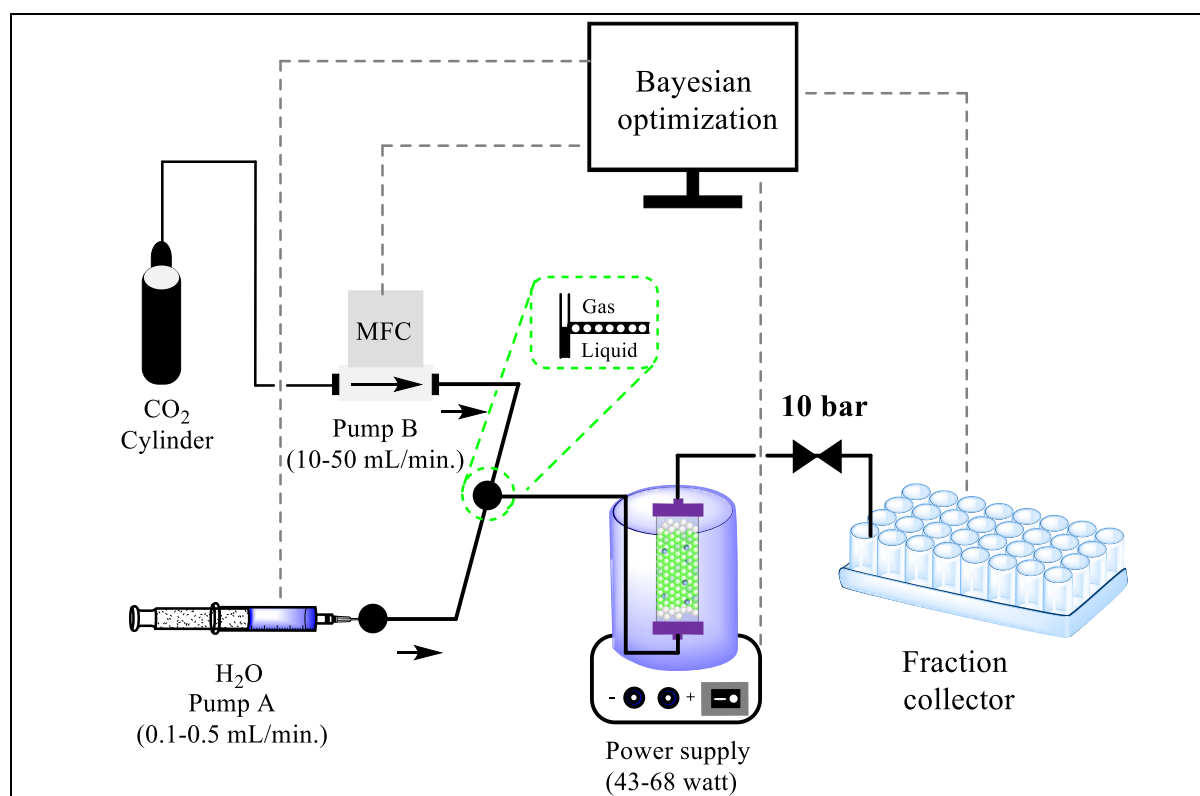

| Entry    | Flow Rate (mL/min.) |                     | Voltage (V) | Light intensity (W) | Residence time (sec) | Moles of MeOH formed mol g <sup>-1</sup> h <sup>-1</sup> |
|----------|---------------------|---------------------|-------------|---------------------|----------------------|----------------------------------------------------------|
|          | deionize water      | CO <sub>2</sub> gas |             |                     |                      |                                                          |
| 1        | 0.24                | 24                  | 12.81       | 46.12               | 2.5                  | 0.116568611                                              |
| 2        | 0.13                | 13                  | 12.58       | 43.14               | 4.6                  | 0.070892019                                              |
| 3        | 0.1                 | 15                  | 14.5        | 68.77               | 4                    | 0.676545398                                              |
| 4        | 0.1                 | 10                  | 14.5        | 52.25               | 5.9                  | 0.404331332                                              |
| 5        | 0.12                | 15                  | 14.09       | 62.15               | 4                    | 0.696583887                                              |
| 6        | 0.5                 | 30                  | 13.12       | 50.02               | 2                    | 0.154446178                                              |
| <b>7</b> | <b>0.26</b>         | <b>22</b>           | <b>14</b>   | <b>63.45</b>        | <b>2.7</b>           | <b>2.346144413</b>                                       |
| 8        | 0.39                | 23                  | 12.55       | 43.61               | 2.6                  | 0.101103029                                              |
| 9        | 0.21                | 18                  | 14.17       | 63.32               | 3.3                  | 2.246529794                                              |
| 10       | 0.12                | 15                  | 14.3        | 64.8                | 4                    | 0.918521272                                              |
| 11       | 0.16                | 17                  | 13.67       | 56.34               | 3.5                  | 0.335836563                                              |
| 12       | 0.16                | 22                  | 13.67       | 56.34               | 2.7                  | 0.508502109                                              |
| 13       | 0.5                 | 12                  | 13.16       | 49.95               | 4.8                  | 1.006162789                                              |
| 14       | 0.27                | 20                  | 13.98       | 60.64               | 3                    | 1.777769094                                              |

|    |      |    |       |       |     |             |
|----|------|----|-------|-------|-----|-------------|
| 15 | 0.12 | 20 | 12.83 | 45.79 | 3   | 0.045950049 |
| 16 | 0.1  | 25 | 13.05 | 48.74 | 2.4 | 0.16079856  |
| 17 | 0.16 | 27 | 13.67 | 56.61 | 2.2 | 0.483087402 |
| 18 | 0.16 | 13 | 14    | 62.14 | 4.6 | 1.062181469 |
| 19 | 0.33 | 15 | 12.58 | 42.92 | 3.9 | 0.073079654 |
| 20 | 0.11 | 20 | 14    | 61.99 | 3   | 0.648112386 |
| 21 | 0.4  | 19 | 14.2  | 64.67 | 3.1 | 2.271185119 |
| 22 | 0.5  | 30 | 13.16 | 49.66 | 2   | 0.075873755 |

**Reaction condition:** 10 bar pressure, od = ¼; id = 4 mm; volume = 2.6 mL PFA cartridge filled with 0.5 g of catalyst and molecular sieves with 1 mL free space.

**Table S5.** Calculation of rate of production of methanol

| Entry | Reference volume ( $\mu\text{L}$ ) | Reference area | Experimental area | Ratio      | Moles of MeOH | Cu amount per g catalyst | Flow rate ( $\mu\text{L}/\text{min.}$ ) | Liquid coming out in 1 h | Moles of MeOH formed ( $\text{mol h}^{-1}$ ) | Moles of MeOH formed ( $\text{mol g}^{-1}\text{h}^{-1}$ ) |
|-------|------------------------------------|----------------|-------------------|------------|---------------|--------------------------|-----------------------------------------|--------------------------|----------------------------------------------|-----------------------------------------------------------|
| 1     | 10                                 | 500000         | 832.32            | 0.00166464 | 5.19388E-08   | 0.0065                   | 243.13721                               | 14588.23285              | 0.000757696                                  | 0.116568611                                               |
| 2     | 10                                 | 500000         | 949.87            | 0.00189974 | 5.92743E-08   | 0.0065                   | 129.56665                               | 7774.000589              | 0.000460798                                  | 0.070892019                                               |
| 3     | 10                                 | 500000         | 11745.11          | 0.02349022 | 7.32924E-07   | 0.0065                   | 100                                     | 6000                     | 0.004397545                                  | 0.676545398                                               |
| 4     | 10                                 | 500000         | 7019.3604         | 0.01403872 | 4.38026E-07   | 0.0065                   | 100                                     | 6000                     | 0.002628154                                  | 0.404331332                                               |
| 5     | 10                                 | 500000         | 10032.26          | 0.02006452 | 6.26038E-07   | 0.0065                   | 120.541                                 | 7232.46                  | 0.004527795                                  | 0.696583887                                               |
| 6     | 10                                 | 500000         | 536.25            | 0.0010725  | 3.34633E-08   | 0.0065                   | 500                                     | 30000                    | 0.0010039                                    | 0.154446178                                               |
| 7     | 10                                 | 500000         | 15630.3           | 0.0312606  | 9.7537E-07    | 0.0065                   | 260.58352                               | 15635.03371              | 0.015249939                                  | 2.346144413                                               |
| 8     | 10                                 | 500000         | 447.61            | 0.00089522 | 2.7932E-08    | 0.0065                   | 392.12004                               | 23527.50003              | 0.00065717                                   | 0.101103029                                               |
| 9     | 10                                 | 500000         | 18608             | 0.037216   | 1.16119E-06   | 0.0065                   | 209.591                                 | 12575.46                 | 0.014602444                                  | 2.246529794                                               |
| 10    | 10                                 | 500000         | 13288.26          | 0.02657652 | 8.29221E-07   | 0.0065                   | 120                                     | 7200                     | 0.005970388                                  | 0.918521272                                               |
| 11    | 10                                 | 500000         | 3632.81           | 0.00726562 | 2.26696E-07   | 0.0065                   | 160.48614                               | 9629.343685              | 0.002182938                                  | 0.335836563                                               |
| 12    | 10                                 | 500000         | 5593.79           | 0.01118758 | 3.49066E-07   | 0.0065                   | 157.81422                               | 9468.866531              | 0.003305264                                  | 0.508502109                                               |
| 13    | 10                                 | 500000         | 3514.02           | 0.00702804 | 2.19284E-07   | 0.0065                   | 497.07705                               | 29824.65423              | 0.006540058                                  | 1.006162789                                               |
| 14    | 10                                 | 500000         | 11255.65          | 0.0225113  | 7.02381E-07   | 0.0065                   | 274.1984                                | 16451.904                | 0.011555499                                  | 1.777769094                                               |
| 15    | 10                                 | 500000         | 664.76            | 0.00132952 | 4.14827E-08   | 0.0065                   | 120                                     | 7200                     | 0.000298675                                  | 0.045950049                                               |
| 16    | 10                                 | 500000         | 2791.53           | 0.00558306 | 1.74198E-07   | 0.0065                   | 100                                     | 6000                     | 0.001045191                                  | 0.16079856                                                |

|    |    |        |          |            |             |        |           |             |             |             |
|----|----|--------|----------|------------|-------------|--------|-----------|-------------|-------------|-------------|
| 17 | 10 | 500000 | 5184.69  | 0.01036938 | 3.23538E-07 | 0.0065 | 161.75691 | 9705.419526 | 0.003140068 | 0.483087402 |
| 18 | 10 | 500000 | 11844.02 | 0.02368804 | 7.39096E-07 | 0.0065 | 155.68966 | 9341.378796 | 0.00690418  | 1.062181469 |
| 19 | 10 | 500000 | 379.75   | 0.0007595  | 2.36973E-08 | 0.0065 | 334.08687 | 20045.18632 | 0.000475018 | 0.073079654 |
| 20 | 10 | 500000 | 10576.7  | 0.0211534  | 6.60012E-07 | 0.0065 | 106.38072 | 6382.804318 | 0.004212731 | 0.648112386 |
| 21 | 10 | 500000 | 9857.18  | 0.01971436 | 6.15113E-07 | 0.0065 | 400       | 24000       | 0.014762703 | 2.271185119 |
| 22 | 10 | 500000 | 263.44   | 0.00052688 | 1.64393E-08 | 0.0065 | 500       | 30000       | 0.000493179 | 0.075873755 |

## Graphs

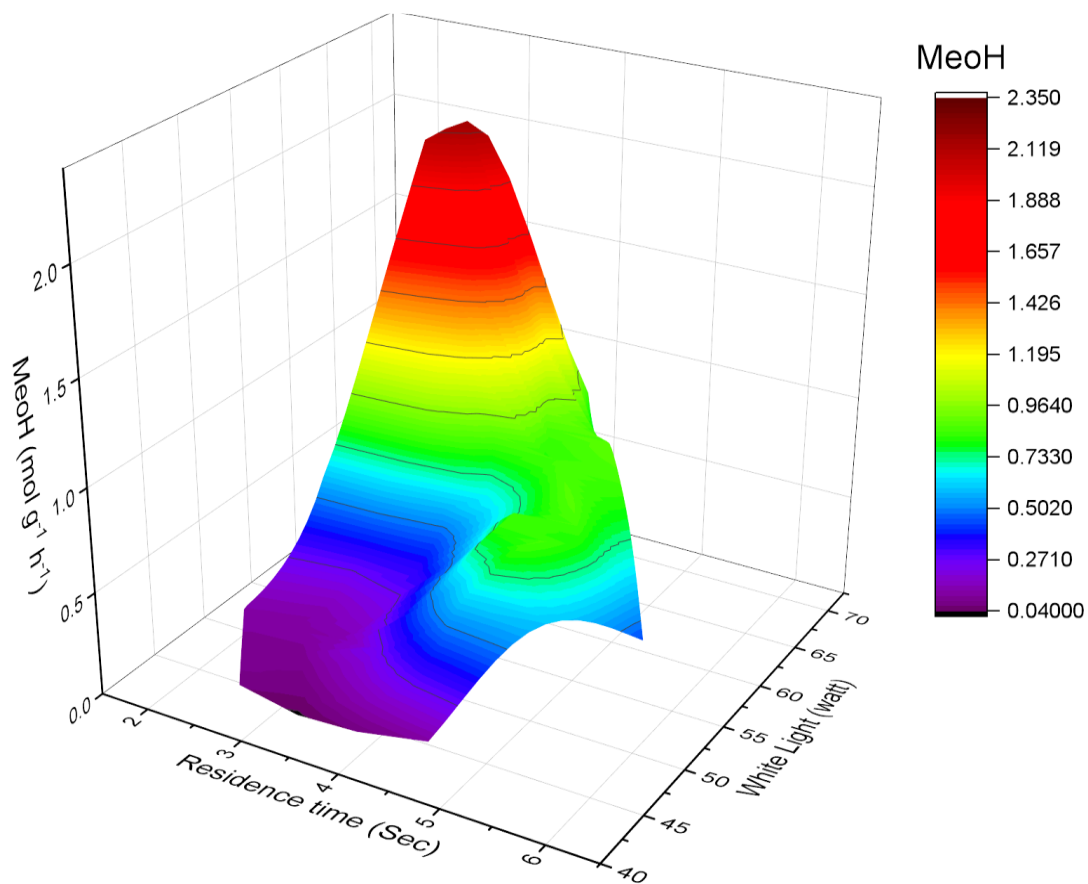

**Figure S19.** AI based system to auto-optimize and navigate this complexity and identify the optimal conditions for the photo activated methanol production.

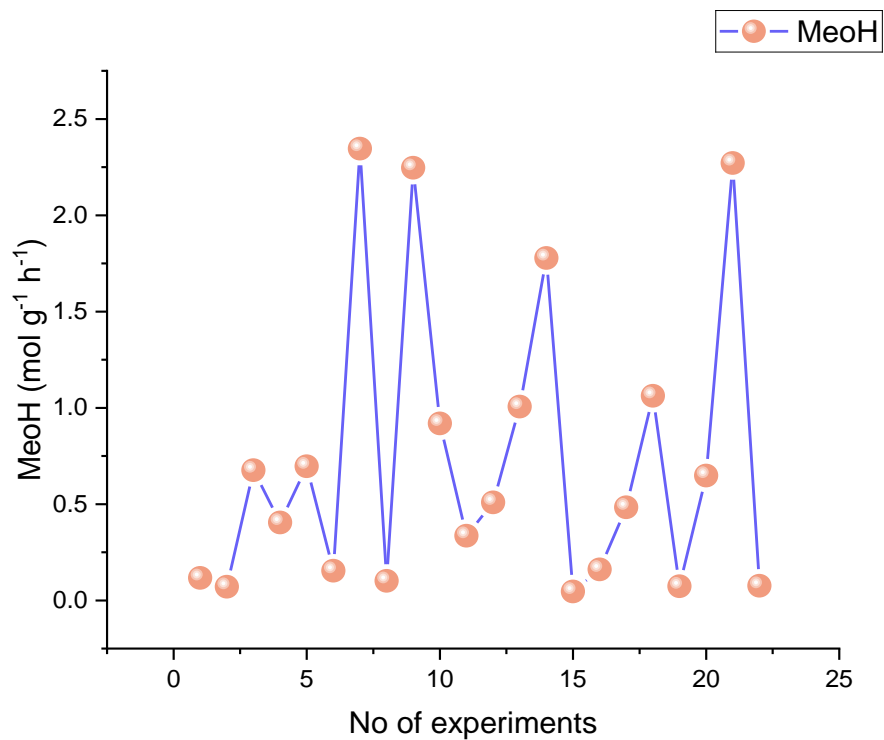

**Figure S20.** 2D graph between no of experiments performed versus yield obtained through AI based auto-optimization for the production of methanol.

**General procedure of running AI-optimized condition for longer time for the production of methanol.**

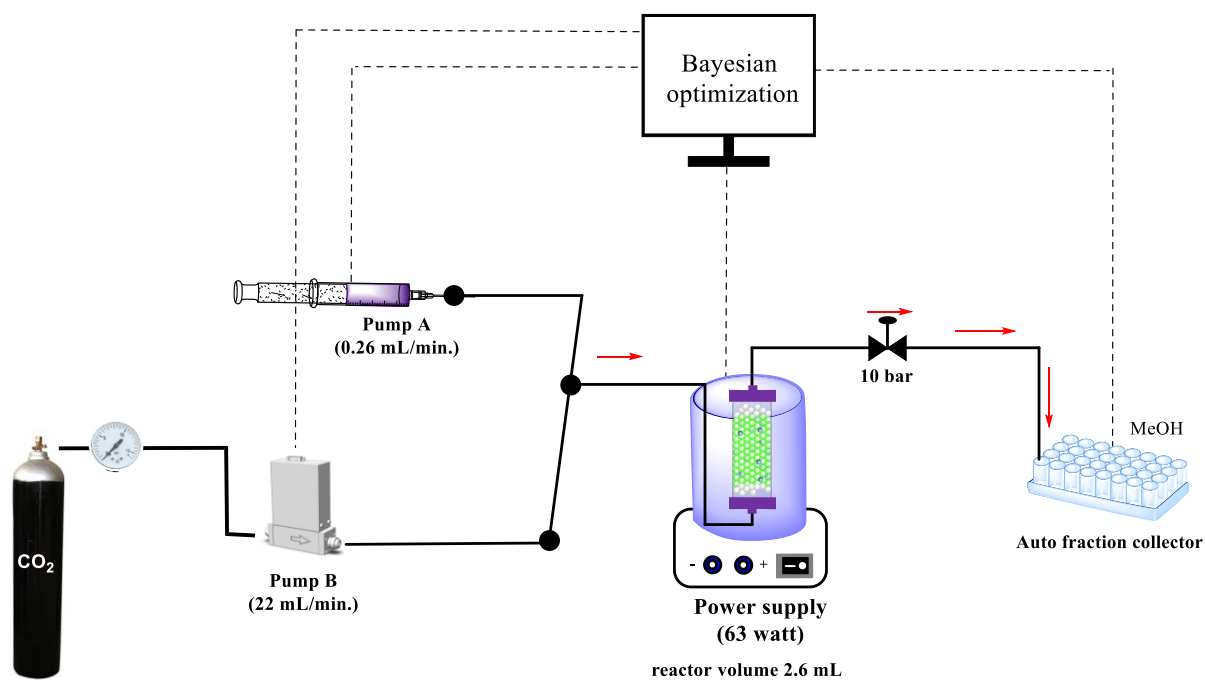



Figure S21. Schematic presentation of **AI integrated** continuous flow for the **production of methanol**.

The stock solution of deionized water was charged in one syringe, and carbon dioxide gas were introduced into the microreactor with a T-mixer using two separate pumps. The flow rate of the deionized water was kept 0.26 mL/min. and flow rate of carbon dioxide gas was maintained at 22 mL/min. The resulting solutions were introduced to a T-mixer and then passed through a PFA tube (od = 1/4; id = 4 mm; volume = 2.6 mL) filled with 0.5 g of CuO/TiO<sub>2</sub> with 1mL free space, under white light (63 W) exposure to occur the methanol production during 2.7 sec. of residence time at room temperature and 10 bar pressure. The out-put of the reactor was connected with spring based back pressure regulator (~10 bar) to maintain the flow of gas Then out coming first one hour of the methanol was discarded and next 5 h of the product methanol 0.075 mol/5h was collected in HPLC bottle.

#### **Quantum efficiency ( $\phi$ ) calculation:**

The values of the number of incident photons ( $N_{\text{photons}}$ ) were calculated using the following equations. Here,

$$N_{\text{photon}} = \frac{P\lambda t}{hc}$$

Power of the light (p) = 63 W = 63 J s<sup>-1</sup>

$\lambda$  = Wavelength of the light (400 nm) = 400 x 10<sup>-9</sup> m

t = Duration of irradiation time, 5 h = 18000 s,

h = Planck's constant = 6.626 x 10<sup>-34</sup> J s

c = Velocity of light = 3 x 10<sup>8</sup> m s<sup>-1</sup>

No of photons incident

$$N_{\text{photon}} = \frac{63 \text{ J s}^{-1} \times 400 \times 10^{-9} \text{ m} \times 18000 \text{ s}}{6.626 \times 10^{-34} \text{ J s} \times 3 \times 10^8 \text{ m s}^{-1}}$$

$$N_{\text{photon}} = 2.3 \times 10^{24}$$

$$\text{Mole's photons incident} = \frac{N_{\text{photon}}}{N}$$

[N = Avogadro's number ( $6.02214 \times 10^{23}$ )]

$$\text{Mole's photons incident} = \frac{2.3 \times 10^{24}}{6.02214 \times 10^{23}}$$

$$\text{Mole's photons incident} = 3.82 \text{ mole}$$

Moles of product formed in 5h:

$$\text{Mole's of product formed} = 7.5 \times 10^{-2}$$

**Quantum efficiency ( $\phi$ ):**

$$\text{Quantum efficiency } (\phi) = \frac{\text{Mole's of product formed}}{\text{Mole's photons incident}} \times 100$$

$$\text{Quantum efficiency } (\phi) = \frac{7.5 \times 10^{-2}}{3.82} \times 100$$

$$\text{Quantum efficiency } (\phi) = 2.0 \%$$

**Quantum efficiency ( $\phi$ ) calculation:**

The values of the number of incident photons ( $N_{\text{photons}}$ ) were calculated using the following equations. Here,

$$N_{\text{photon}} = \frac{P\lambda t}{hc}$$

$$\text{Power of the light (p)} = 63 \text{ W} = 63 \text{ J s}^{-1}$$

$$\lambda = \text{Wavelength of the light (400 nm)} = 400 \times 10^{-9} \text{ m}$$

$$t = \text{Duration of irradiation time, 5 h} = 18000 \text{ s,}$$

$$h = \text{Planck's constant} = 6.626 \times 10^{-34} \text{ J s}$$

$$c = \text{Velocity of light} = 3 \times 10^8 \text{ m s}^{-1}$$

No of photons incident

$$N_{\text{photon}} = \frac{63 \text{ J s}^{-1} \times 700 \times 10^{-9} \text{ m} \times 18000 \text{ s}}{6.626 \times 10^{-34} \text{ J s} \times 3 \times 10^8 \text{ m s}^{-1}}$$

$$N_{\text{photon}} = 4.0 \times 10^{24}$$

$$\text{Mole's photons incident} = \frac{N_{\text{photon}}}{N}$$

[N = Avogadro's number ( $6.02214 \times 10^{23}$ )]

$$\text{Mole's photons incident} = \frac{4.0 \times 10^{24}}{6.02214 \times 10^{23}}$$

$$\text{Mole's photons incident} = 6.64 \text{ mole}$$

Moles of product formed in 5h:

$$\text{Mole's of product formed} = 7.5 \times 10^{-2}$$

**Quantum efficiency ( $\phi$ ):**

$$\text{Quantum efficiency } (\phi) = \frac{\text{Mole's of product formed}}{\text{Mole's photons incident}} \times 100$$

$$\text{Quantum efficiency } (\phi) = \frac{7.5 \times 10^{-2}}{6.64} \times 100$$

$$\text{Quantum efficiency } (\phi) = 1.1 \%$$

**Table S6:** Comparison table for photocatalytic methanol production

| S.No | Catalyst                 | Light source                                   | Solvent              | Methanol production rate                    | Reference     |
|------|--------------------------|------------------------------------------------|----------------------|---------------------------------------------|---------------|
| 1.   | POM@TiO <sub>2</sub>     | Xe lamp (100 mW.cm <sup>-2</sup> ).            | 5 mL ultrapure water | 21 μmol g <sup>-1</sup> h <sup>-1</sup>     | <sup>7</sup>  |
| 2.   | 2.5% Ag/TiO <sub>2</sub> | UV and visible light irradiation (λ > 400 nm). | Water                | 135.06 μmol g <sup>-1</sup> h <sup>-1</sup> | <sup>10</sup> |
| 3.   | T120                     | solar light (λ > 200 nm)                       | NaHO <sub>3</sub>    | 9.1 μmol g <sup>-1</sup> h <sup>-1</sup>    | <sup>11</sup> |

|            |                                                    |                      |                                                                  |                                                                   |                  |
|------------|----------------------------------------------------|----------------------|------------------------------------------------------------------|-------------------------------------------------------------------|------------------|
| 4.         | CD/FAT                                             | 300 W Xenon lamp     | Water                                                            | $24.2 \mu\text{mol g}^{-1} \text{h}^{-1}$                         | <sup>12</sup>    |
| 5.         | 0.5% Cu <sub>1</sub> @BiOBr                        | 300 W Xenon lamp     | water                                                            | $627.66 \mu\text{mol g}^{-1} \text{h}^{-1}$                       | <sup>13</sup>    |
| 6.         | STCu <sub>0.08</sub> -H                            | 300 W xenon lamp     | water                                                            | $5.38 \pm 0.19 \mu\text{mol g}^{-1} \text{h}^{-1}$                | <sup>14</sup>    |
| 7.         | 4%Ni/TiO <sub>2</sub>                              | 60 W-UV light        | water                                                            | $90.81 \mu\text{mol g}^{-1} \text{h}^{-1}$                        | <sup>15</sup>    |
| 8.         | ZnFe <sub>2</sub> O <sub>4</sub> /TiO <sub>2</sub> | 500 W xenon lamp     | Water /Na <sub>2</sub> S, Na <sub>2</sub> SO <sub>3</sub> , /KOH | $27.78 \mu\text{mol g}^{-1} \text{h}^{-1}$                        | <sup>16</sup>    |
| 9.         | 23.2% AgBr/TiO <sub>2</sub>                        | 150W Xe lamp         | Water/ 0.2 M KHCO <sub>3</sub>                                   | $15.57 \mu\text{mol g}^{-1} \text{h}^{-1}$                        | <sup>17</sup>    |
| 10.        | Ru(bpy) <sub>3</sub> /TiO <sub>2</sub>             | 20W LED              | Water /DMF / TEA                                                 | $78.16 \mu\text{mol g}^{-1} \text{h}^{-1}$                        | <sup>18</sup>    |
| 11.        | CeF <sub>3</sub> /TiO <sub>2</sub>                 | 500 W Xenon lamp     | Water                                                            | $54.06 \mu\text{mol g}^{-1} \text{h}^{-1}$                        | <sup>19</sup>    |
| 12.        | Cu <sub>2</sub> O                                  | 300 W Xe lamp        | Ultrapure deionized H <sub>2</sub> O                             | $1.2 * 10^6 \mu\text{mol g}^{-1} \text{h}^{-1}$                   | <sup>20</sup>    |
| <b>13</b>  | <b>MCT-100</b>                                     | <b>420 W Xe lamp</b> | <b>DMF/Deionised H<sub>2</sub>O</b>                              | <b><math>842 \mu\text{mol g}^{-1} \text{h}^{-1}</math></b>        | <b>This work</b> |
| <b>14*</b> | <b>MCT-100</b>                                     | <b>White LED</b>     | <b>Deionised H<sub>2</sub>O</b>                                  | <b><math>2.3 * 10^6 \mu\text{mol g}^{-1} \text{h}^{-1}</math></b> | <b>This work</b> |

(\* ) Represents reaction performed in continuous flow with AI.

## References

1. X. Xue, Y. Weng, S. Yang, S. Meng, Z. Zhang, G. Yi and Y. Zhang, *Environ. Sci. Pollut. Res. Int.*, 2021, **28**, 15883-15889.
2. I. Mondal and U. Pal, *Phys. Chem. Chem. Phys.*, 2016, **18**, 4780-4788.
3. H. Lee, J.-H. Lee, Y. Lee, E.-B. Cho and Y. J. Jang, *Appl. Surf. Sci.*, 2023, **620**, 156812.
4. B.-H. Lee, S. Park, M. Kim, A. K. Sinha, S. C. Lee, E. Jung, W. J. Chang, K.-S. Lee, J. H. Kim, S.-P. Cho, H. Kim, K. T. Nam and T. Hyeon, *Nat. Mater.*, 2019, **18**, 620-626.
5. M. Wang, M. Liu, J. Lu and F. Wang, *Nat. Commun.*, 2020, **11**, 1083.
6. A. Tiwari, A. Goutam, S. Sk, P. Vijayanand, B. M. Abraham and U. Pal, *Int. J. Hydrogen Energy*, 2023, **48**, 29178-29188.
7. S.-Y. Xu, W. Shi, J.-R. Huang, S. Yao, C. Wang, T.-B. Lu and Z.-M. Zhang, *Angew. Chem. Int. Ed.*, 2024, **63**, e202406223.
8. C. Pan, H. Shen, G. Liu, X. Zhang, X. Liu, H. Liu, P. Xu, W. Chen, Y. Tian, H. Deng, H. Sun, J. Wang, Z. Luo, L. Zhang and Y. Guo, *ACS Appl. Nano Mater.*, 2022, **5**, 10980-10990.
9. Y.-S. Ouyang, S.-T. Zheng, G.-W. Guan and Q.-Y. Yang, *ACS Appl. Energy Mater.*, 2022, **5**, 14455-14465.
10. E. Liu, L. Kang, F. Wu, T. Sun, X. Hu, Y. Yang, H. Liu and J. Fan, *Plasmonics*, 2014, **9**, 61-70.
11. W. Wang, D. Xu, B. Cheng, J. Yu and C. Jiang, *J. Mater. Chem. A*, 2017, **5**, 5020-5029.
12. Y. Wang, R. Godin, J. R. Durrant and J. Tang, *Angew. Chem. Int. Ed.*, 2021, **60**, 20811-20816.
13. K. Wang, M. Cheng, F. Xia, N. Cao, F. Zhang, W. Ni, X. Yue, K. Yan, Y. He, Y. Shi, W. Dai and P. Xie, *Small*, 2023, **19**, 2207581.
14. Z. Zhang, R. Chen, L. Wang, X. Chen, J. Ding, J. Zhang, H. Wan and G. Guan, *Appl. Surf. Sci.*, 2023, **609**, 155297.
15. P. Athikaphan, S. Neramittagapong, P. Assawasaengrat and A. Neramittagapong, *Energy Reports*, 2020, **6**, 1162-1166.
16. F. Iqbal, A. Mumtaz, S. Shahabuddin, M. I. Abd Mutalib, M. S. Shahaarun, T. D. Nguyen, M. R. Khan and B. Abdullah, *J Chem Technol Biotechnol*, 2020, **95**, 2208-2221.
17. M. Abou Asi, C. He, M. Su, D. Xia, L. Lin, H. Deng, Y. Xiong, R. Qiu and X.-z. Li, *Catal. Today*, 2011, **175**, 256-263.
18. P. Kumar, C. Joshi, N. Labhsetwar, R. Boukherroub and S. L. Jain, *Nanoscale*, 2015, **7**, 15258-15267.
19. C. Tang, W. Hou, E. Liu, X. Hu and J. Fan, *J. Lumin.*, 2014, **154**, 305-309.
20. Y. A. Wu, I. McNulty, C. Liu, K. C. Lau, Q. Liu, A. P. Paulikas, C.-J. Sun, Z. Cai, J. R. Guest, Y. Ren, V. Stamenkovic, L. A. Curtiss, Y. Liu and T. Rajh, *Nat. Energy*, 2019, **4**, 957-968.
